# Supplementary material for: Effect of rapamycin on bone mass and strength in the α2(I)‐G610C mouse model of osteogenesis imperfecta
Source: PubMed Central journal article supplement (PMC6378195; doi:10.1111/jcmm.14072), 2018-12-30
Supplement: JCMM-23-1735-s001.pdf [file JCMM-23-1735-s001.pdf]

## **Supplementary Data**

**Effect of rapamycin on bone mass and strength in the  $\alpha 2(I)$ -G610C mouse model of osteogenesis imperfecta**

**Bateman et al**

## Supplementary Table 1

### RT-qPCR primer list

| <b>Gene</b>             | <b>Forward primer</b>  | <b>Reverse Primer</b>    |
|-------------------------|------------------------|--------------------------|
| <i>Gapdh</i>            | AATGTGTCCGTCGTGGATCT   | GCTTCACCACCTTCTTGATGT    |
| <i>Hspa5 (BiP)</i>      | TGAAACTGTGGGAGGAGTCA   | TTCAGCTGTCACTCGGAGAA     |
| <i>Ddit3 (Chop)</i>     | GCGACAGAGCCAGAATAACA   | GATGCACTTCCTTCTGGAACA    |
| <i>Serpinh1 (Hsp47)</i> | ATGCCTGCCCTAGAATTGTTAT | AAAAGGGAGAAAAACAAAAGTTCA |
| <i>Atf4</i>             | AGAAGCTGAAAAAGATGGAGCA | GCTTCTTCTGGCGGTACCTA     |
| <i>Col1a1</i>           | GACTGGCAACCTCAAGAAGG   | CAAGTTCGGGTGTGACTCG      |
| <i>Runx2</i>            | TCTCCACACCATTAGAGGTTGA | GGGTGCTTCTGCTACCACTC     |
| <i>Bglap</i>            | AGACTCCGGCGCTACCTT     | CTCGTCACAAGCAGGGTTAAG    |

Supplementary Figure 1. Cell stress, apoptosis and differentiation in cultured parietal bone osteoblasts

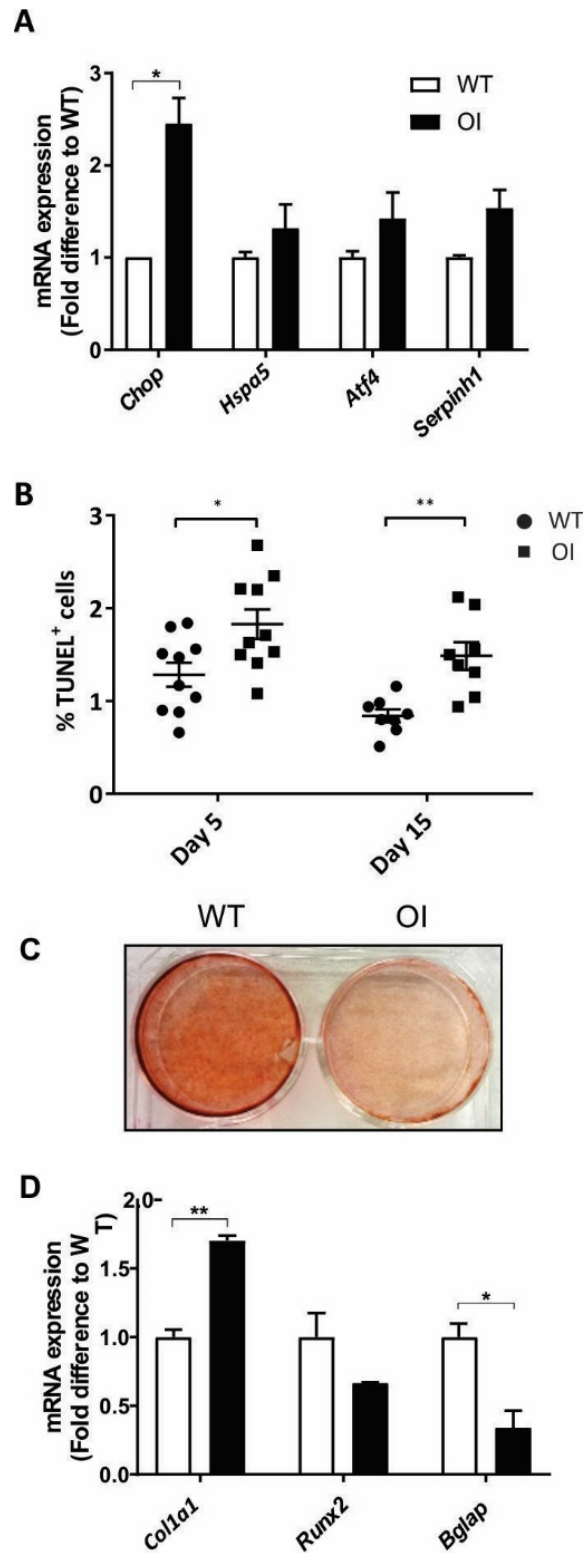

**A)** Primary osteoblasts from 10 day old wild type (WT) and OI mice were cultured for 21 days in osteogenic medium, mRNA extracted and RT-qPCR performed in triplicate using primer pairs for the indicated genes normalised to the housekeeping gene *Gapdh*. Plots depict mean fold difference of OI to WT control with standard deviation from the mean, N = 3 independent experiments, statistical significance was determined assuming a normal distribution among the groups using unpaired one-tail Student's *t* test, \*  $p < 0.05$ ; **B)** Apoptosis in calvarial osteoblasts. Calvarial cells were cultured *in vitro* in osteogenic medium, for 5 and 15 days, fixed and apoptosis was assayed by TUNEL staining. TUNEL-positive nuclei were counted and expressed related to the total number of DAPI-positive nuclei. □ WT, ■ OI. All values are mean  $\pm$  S.E.M. Student's t-test, \*  $p < 0.05$ , \*\* $p < 0.01$ ; **C)** Cultures stained with Alizarin Red to visualize calcification after 21 days in osteogenic medium; **D)** RT-qPCR of osteoblast differentiation markers after 21 days culture as described in A, \*  $p < 0.05$ , \*\* $p < 0.01$ .

Supplementary Figure 2. OI and WT mouse weight

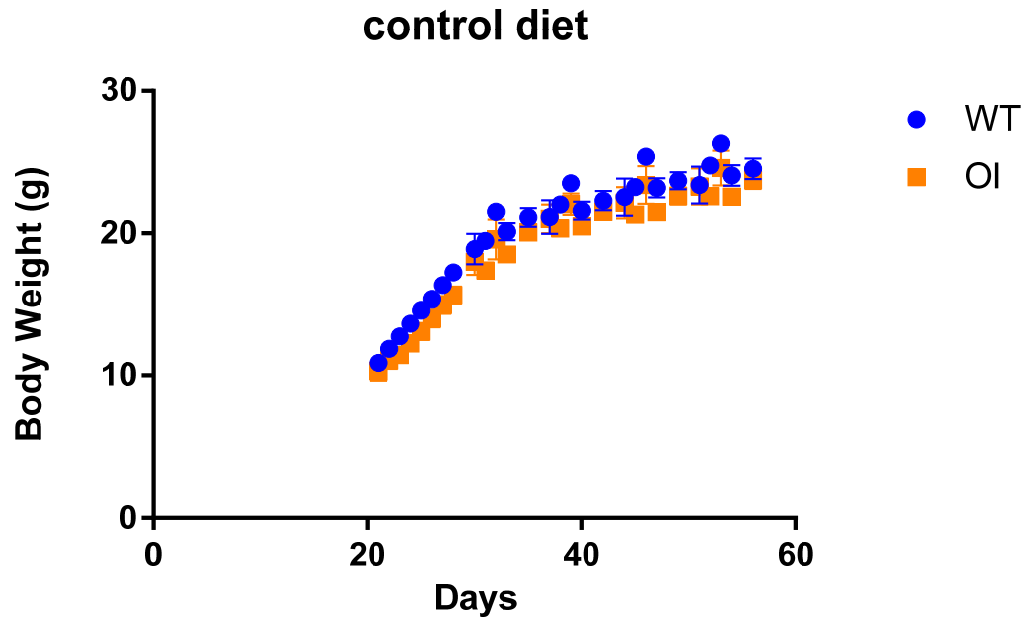

Wild type mice (N=8) and OI mice (N=8) were weighed daily from 3 weeks to 8 weeks of age.

All values are mean  $\pm$  S.E.M.
